# Supplementary material
Source: PubMed Central journal article supplement (PMC3160765)

## SUPPORTING INFORMATION

The bar graph in SI Figure 1 shows the same peak wavelength emission intensity for the QDs before and after lipid conjugation. SI Figure 2 indicates that the QD liposomes and the QDs were non-toxic in the concentrations tested (0.01 to 0.20  $\mu\text{M}$ ) when applied to U87 cells in culture.

SI Figure 1

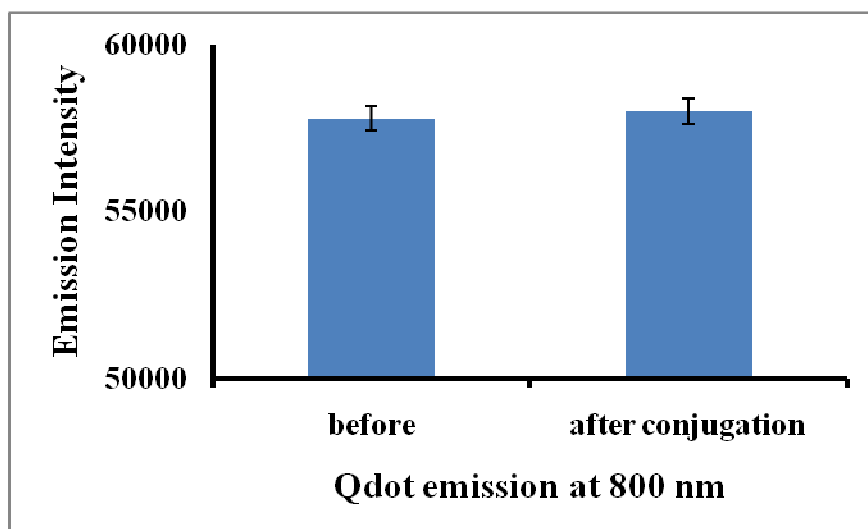

SI Figure 2

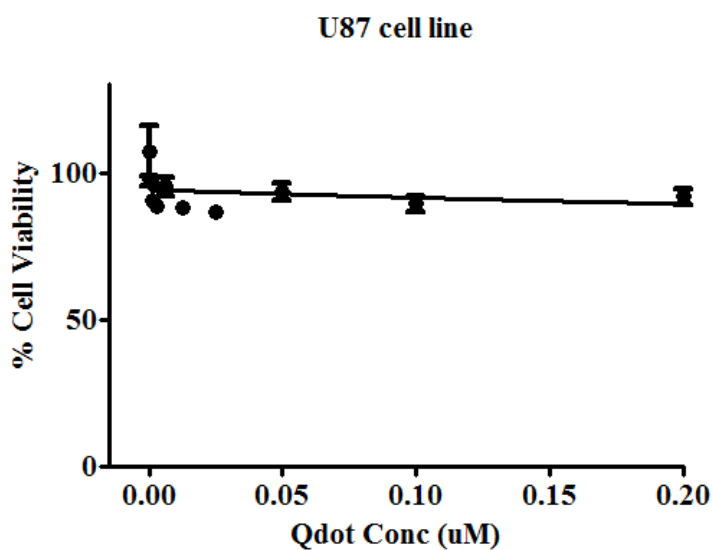

Supplement: NIHMS315655-supplement-1_si_001.pdf [file NIHMS315655-supplement-1_si_001.pdf]
